RESEARCH ARTICLE

# Identification of Phosphorylated Cyclin-Dependent Kinase 1 Associated with Colorectal Cancer Survival Using Label-Free Quantitative Analyses

Peng-Chan Lin<sup>1</sup>✉, Yi-Fang Yang<sup>2</sup>✉, Yu-Chang Tyan<sup>3,4,5,6</sup>, Eric S. L. Hsiao<sup>2</sup>, Po-Chen Chu<sup>7</sup>, Chung-Ta Lee<sup>8</sup>, Jenq-Chang Lee<sup>9</sup>, Yi-Ming Arthur Chen<sup>4,6</sup>, Pao-Chi Liao<sup>2\*</sup>

**1** Department of Internal Medicine, National Cheng Kung University Hospital, College of Medicine, National Cheng Kung University, Tainan, Taiwan, **2** Department of Environmental and Occupational Health, College of Medicine, National Cheng Kung University, Tainan, Taiwan, **3** Department of Medical Imaging and Radiological Sciences, Kaohsiung Medical University, Kaohsiung, Taiwan, **4** Center for Infectious Disease and Cancer Research, Kaohsiung Medical University, Kaohsiung, Taiwan, **5** Institute of Medical Science and Technology, National Sun Yat-Sen University, Kaohsiung, Taiwan, **6** Graduate Institute of Medicine, College of Medicine, Kaohsiung Medical University, Kaohsiung, Taiwan, **7** Institute of Basic Medical Sciences, College of Medicine, National Cheng Kung University, Tainan, Taiwan, **8** Department of Pathology, College of Medicine, National Cheng Kung University, Tainan, Taiwan, **9** Department of Surgery, College of Medicine, National Cheng Kung University, Tainan, Taiwan

✉ These authors contributed equally to this work.

\* [liaopc@mail.ncku.edu.tw](mailto:liaopc@mail.ncku.edu.tw)

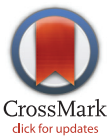

**OPEN ACCESS**

**Citation:** Lin P-C, Yang Y-F, Tyan Y-C, Hsiao ESL, Chu P-C, Lee C-T, et al. (2016) Identification of Phosphorylated Cyclin-Dependent Kinase 1 Associated with Colorectal Cancer Survival Using Label-Free Quantitative Analyses. *PLoS ONE* 11(7): e0158844. doi:10.1371/journal.pone.0158844

**Editor:** Mauro Salvi, University of Padova, ITALY

**Received:** December 7, 2015

**Accepted:** June 22, 2016

**Published:** July 6, 2016

**Copyright:** © 2016 Lin et al. This is an open access article distributed under the terms of the [Creative Commons Attribution License](https://creativecommons.org/licenses/by/4.0/), which permits unrestricted use, distribution, and reproduction in any medium, provided the original author and source are credited.

**Data Availability Statement:** All relevant data are within the paper and its Supporting Information files.

**Funding:** This study was supported by grants from the National Cheng Kung University, Taiwan (NCKUH-10105014); the Ministry of Science and Technology, Taiwan (MOST 103-2811-M-006-021, 103-2113-M-006-003-MY3, 100-2113-M-006-002-MY3, 102-2352-B-006-003); the National Science Council, Taiwan (NSC 99-2923-M-006-001); and Kaohsiung Medical University, Aim for the Top 500 Universities grant and Aim for the Top Universities Grant, No. KMU-TP104E12.

## Abstract

Colorectal cancer is the most common form of cancer in the world, and the five-year survival rate is estimated to be almost 90% in the early stages. Therefore, the identification of potential biomarkers to assess the prognosis of early stage colorectal cancer patients is critical for further clinical treatment. Dysregulated tyrosine phosphorylation has been found in several diseases that play a significant regulator of signaling in cellular pathways. In this study, this strategy was used to characterize the tyrosine phosphoproteome of colorectal cell lines with different progression abilities (SW480 and SW620). We identified a total of 280 phosphorytyrosine (pTyr) peptides comprising 287 pTyr sites from 261 proteins. Label-free quantitative analysis revealed the differential level of a total of 103 pTyr peptides between SW480 and SW620 cells. We showed that cyclin-dependent kinase I (CDK1) pTyr15 level in SW480 cells was 3.3-fold greater than in SW620 cells, and these data corresponded with the label-free mass spectrometry-based proteomic quantification analysis. High level CDK1 pTyr15 was associated with prolonged disease-free survival for stage II colorectal cancer patients (n = 79). Taken together, our results suggest that the CDK1 pTyr15 protein is a potential indicator of the progression of colorectal cancer.

**Competing Interests:** The authors have declared that no competing interests exist.

## Introduction

Colorectal cancer is a common disease and disease-specific mortality rate close to one-third in developed nations. [1]. According to an investigation by the American Cancer Society from 2004 to 2010, the five-year survival rate for early colorectal cancer stage I and II patients after diagnosis and treatment with surgery was 92% and 87%, respectively. In contrast, the five-year survival rates of colorectal cancer patients dramatically decreased to 53% and 11% for stage III and IV disease, respectively. The vast majority of colorectal cancer deaths are thought to be due to cancer metastasis and other cancer complications. The prognosis of colorectal cancer is affected by various features such as gender, age, and the quality of surgical intervention at the time of initial diagnosis. A number of colorectal tumor characteristics have also been applied to and evaluated for prognostic significance [2], such as lymphatic invasion, immunohistochemistry and plasma carcinoembryonic antigen (CEA) levels [3, 4]. This metastasis forms the basis of all the staging systems for this cancer have prognostic power compare with other signal feature at presentation [5–7]. Therefore, the identification of prognostic molecular biomarkers in surgical resection specimens is critical for helping us to predict disease-free survival of early stage colorectal cancer patients following curative surgery or for determining whether additional adjuvant therapies are needed.

Protein phosphorylation plays an important role in many biological processes, including cell proliferation, cell cycle regulation, and signaling pathways [8, 9]. Cells regulate phosphorylation via an enormous variety of protein kinase and phosphatases. Therefore, characterizing the phosphorylation status of proteins involved in complex cell signaling networks is critically important for understanding signal transduction within cells. Protein phosphorylation primarily occurs on three amino acids, which include serine, threonine, and tyrosine. Investigations of the phosphoproteome have estimated that the ratio of phosphorylation is 90%: 10%: <1% for phosphoserine (pSer), phosphothreonine (pThr), and phosphotyrosine (pTyr), respectively [10, 11]. Dysregulated tyrosine phosphorylation progressively increases in tumors during the progression and metastasis of colorectal carcinoma [12, 13] and lung cancer [14, 15]. Because of the relatively low abundance of tyrosine phosphorylation, many strategies and techniques have been specifically developed to separate and enrich tyrosine phosphopeptides from a sample. These enrichment methods for tyrosine phosphopeptides have included the following, antibody-based enrichment, which involves a number of phosphopeptide-specific antibodies [16–18]; metal oxide affinity chromatography, in which TiO<sub>2</sub> enrichment is employed to enrich phosphopeptides [19–22]; and/or immobilized metal affinity chromatography (IMAC), in which metal ions (positive charges) are chelated to stationary beads and bind with phosphopeptides (negatively charges) in a mobile phase [23–25]. Currently, large-scale comparative phosphoproteomics studies based on mass spectrometry (MS) have emerged as significant tools. Such studies have supported and discriminated cellular protein phosphorylation in abnormalities leading to various phenotypes and diseases [14, 20, 26, 27].

In the present study, we employed biochemical characterization combined with a comparative phosphotyrosine proteome study of SW480 and SW620 cells to select potential prognosis biomarkers for colorectal cancer. Two colorectal cancer cell lines with different metastatic abilities, SW480 and SW620, were selected for this tyrosine phosphoproteome study. The SW480 and SW620 cells were derived from a primary colorectal adenocarcinoma and lymph node metastasis, respectively. Both cell lines were acquired at different stages of colon carcinoma in a single patient and therefore shared a genetic background, making it easier to study the genetic basis of their phenotypic differences [28]. In this study, we undertake to identify these protein targets that are at different levels in these two colorectal cell lines and to evaluate their prognostic value in colorectal cancer tissue.

## Materials and Methods

### Cell Lines

The colorectal cancer cell lines SW480 and SW620 were purchased from the Bioresource Collection and Research Center (BCRC), Hsinchu City, Taiwan. Briefly, the human colorectal adenocarcinoma cell lines SW480 and SW620 were maintained in Leibovitz's L-15 medium supplemented with 10% fetal bovine serum (FBS), 1% penicillin (Gibco, Life Technologies, Carlsbad, CA) and 1% streptomycin (Thermo) and were incubated at 37°C under 5% CO<sub>2</sub>.

### Western Blot Analysis

Ten micrograms of total protein from both the SW480 and SW620 cell lysates were individually separated on NuPAGE4-12%Bis-Tris gels (Life Technologies, Carlsbad, CA) using a Novex Mini-Cell system. The proteins were transferred to a PVDF membrane and the steps for transfer with PVDF membrane according to the iBlot's protocol (Life Technologies). Following the PVDF membrane was blocked with 5% non-fat milk in 1XPBST. The PVDF membranes were separately probed with an anti-GAPDH antibody (GeneTex, San Antonio, TX), an anti-CDK1 (phospho Y15) antibody (Epitomics, clone EPR7875, cat. no ab133463, and dilution 1:1000) and an anti-phosphotyrosine-CDK2 (pTyr15) antibody (Epitomics, clone EPR2233Y, cat. no ab176146, and dilution 1:1000). The PVDF membranes were washed with 1XTBST (Tris-buffered saline and Tween-20) and incubated with the appropriate horseradish peroxidase (HRP) conjugated-secondary antibodies (Sigma-Aldrich) for 1 h., signals were developed using an enhanced chemiluminescence reagent (PerkinElmer, Waltham, MA). Following photographed using a UVP BioSpectrum imaging system (UVP, Upland, CA).

### Immunoaffinity Enrichment for pTyr Proteins

Prior to immunoaffinity enrichment for tyrosine phosphopeptides from the two prepared colorectal cancer cell lysates, 700 µg of extracted proteins were resuspended in 300 µL of radioimmunoprecipitation assay (RIPA) buffer (50 mM Tris-HCl, 150 mM NaCl, 1% NP-40, 0.5% sodium deoxycholate, 0.1% SDS) and reacted with 50 µL of agarose-immobilized pTyr-specific antibodies 4G10 (10 µg) (Millipore, Temecula, CA) and PT66 (10 µg) (Sigma-Aldrich, St. Louis, MO) mixed in a 1:1 (w/w) ratio [20, 29]. Before starting the incubation process, the antibody-agarose beads were washed five times by 200 µL of RIPA buffer. The prepared cell lysates were added to the antibody-agarose beads with overnight incubated at 4°C. After incubation, the sample was centrifuged for five min at 5000 x g at 4°C and washed three times with 500 µL RIPA buffer and two times with 1 mL ddH<sub>2</sub>O. Bound proteins were eluted four times using 50 µL of sample buffer (Invitrogen) supplemented with 400 mM dithiothreitol (Sigma-Aldrich) at room temperature.

### Stacking Gel Concentration and In-gel Digestion

To concentrate the proteins eluted from the immunoaffinity enrichment, we employed an SDS-PAGE gel composed of a 5% acrylamide stacking gel and a 20% acrylamide separating gel. After electrophoresis, the protein was concentrated at the border between the stacking gel and the separating gel. The gel was then stained with Coomassie brilliant blue for 1 h. The protein band was detained and excised in 1 mm<sup>3</sup> pieces, which were then subjected to in-gel digestion. The gel pieces were washed two times with a 1:1 solution of acetonitrile (ACN) (J.T. Baker) and 25 mM ammonium bicarbonate. Subsequently, the protein mixtures were reduced and alkylated [20]. Trypsin digestion was performed with overnight incubated at 37°C, and the digested proteins were lyophilized for further analysis.

## TiO<sub>2</sub> micro-column Enrichment and Alkaline Phosphatase Treatment

Sample before loading to the TiO<sub>2</sub> micro-column, column was rinsed with 100  $\mu$ L of 80% ACN (containing 2% trifluoroacetic acid (TFA)). Next step, the TiO<sub>2</sub> micro-column was equilibrated with loading buffer (containing 65% ACN and 2% TFA with saturated glutamic acid (J.T. Baker)) for two min; this process was repeated three times. Add 185  $\mu$ L of loading buffer to each sample (trypsin-digested samples (15  $\mu$ L) from different cell lysates) and loaded into the TiO<sub>2</sub> micro-column with a syringe pump (set at a flow rate of 10  $\mu$ L/min). The micro-column was washed in the following order: (i) 20  $\mu$ L sample loading buffer, (ii) 20  $\mu$ L 65% ACN/0.5% TFA, and (iii) 20  $\mu$ L of 65% ACN/0.1% TFA. To elute the bound peptides, add the 30  $\mu$ L of 300 mM NH<sub>4</sub>OH/50% ACN to each column. An aliquot of the TiO<sub>2</sub>-eluted sample was added with 0.25 U of alkaline phosphatase (Roche, Applied Science, Mannheim, Germany) in 1 $\times$ dephosphorylation buffer, pH 8.0 (Roche), at 37°C for 2 hr.

## LC-MS and Targeted LC-MS/MS Analyses

The peptide mixtures were analyzed by full-scan LC-MS on a nanoAcquity system (Waters, Milford, MA) coupled to an LTQ-Orbitrap spectrometer (Thermo Scientific) provided with a PicoView nanospray interface. Peptide mixtures were loaded into a 75- $\mu$ m I.D.  $\times$ 250-mm nanoACQUITY UPLC BEH130 column packed with C18 resin (Waters). The prepared peptide mixtures were separated by gradient buffer (buffer A: 0.1% formic acid in water; buffer B: 0.1% formic acid in ACN) with 10 to 35% solvent B for forty min, ensued by a sharp increase to 90% B in five min; then, a 300 nL/min flow rate was maintained for five minutes. The effluent from the HPLC column was electrosprayed directly into the MS. The LTQ-Orbitrap apparatus was ran in full-scan MS acquisition mode ( $m/z$  300–2000). Targeted LC-MS/MS analysis was performed, and the possible phosphopeptide signals ( $m/z$  values) obtained from the iPhos process (see the next paragraph in the [Methods](#) section) were set in the parent mass list for LTQ-Orbitrap MS.

## Identification of Potential Phosphopeptide Signals by iPhos Software

The raw data generated by an LTQ-Orbitrap MS were converted to an open file representation mzXML format using an open-source program, msInspect [30], which was developed by the Computational Proteomics Laboratory (CPL); operational analysis was then conducted (<http://proteomics.fhcre.org>) to acquire peak information after peak detection, monoisotopic peak determination, and original mass calculation. Then, a TSV format file was produced for further iPhos software analysis. To determine the potential phosphopeptide signals, the iPhos program was used; a mass shift of -79.966 Da (or multiples of -79.966) due to dephosphorylation reactions was found in the detection by comparing the phosphopeptide signals and the corresponding dephosphorylated peptide signals. The iPhos program is an open source application written in Python 2.6 that operates in Windows (<http://cosbi3.ee.ncku.edu.tw/iPhos/>) [17, 31]. The iPhos program is designed to generate an inclusion list of potential phosphopeptide candidates for future targeted LC-MS/MS analysis.

## pTyr Protein Identification by Mascot Search

The raw data generated by the LTQ-Orbitrap MS were converted to an msm format using the Raw2msm program (MPI for Biochemistry, Martinsried, Germany). The MS/MS peak list was submitted to the Mascot search server (Version: 2.2, Matrix Science Ltd., London, UK) for a search of the Swiss-Prot human non-redundant database (Database: SwissProt; update: Feb 19, 2014, total 542503 sequences; Taxonomy: Homo sapiens (20271 sequences)) with 95%

confidence level or greater. Up to two missed cleavages were allowed for the performance of trypsin-specific. Carboxyamidomethylation, deamidation, oxidation, and phosphorylation were allowed as variable post-translation modifications. The mass deviations for the precursor ions and fragment ions were all set to 20 ppm. A false discovery rate of  $\leq 2.5\%$  was calculated by the Mascot-integrated decoy database search. Finally, the following three criteria were used to assess the results: (i) the Mascot search result reported a pTyr modification, (ii) the pTyr peptide score was above 25, and (iii) the pTyr peptide rank was number one in the Mascot search results. Only results that met all of these criteria were identified as approved pTyr peptides in this study.

## Label-Free Quantitative Progenesis QI Analysis

Data from the 12 LC-MS runs were aligned by using Progenesis QI software (Nonlinear Dynamics, Newcastle upon Tyne, UK). One run was chosen as the alignment reference, and the other runs were automatically aligned to the reference according to their retention times. Each run was illustrated by a proprietary algorithm as a two-dimensional feature map as  $m/z$  value versus retention time. Features with fewer than three isotopes and only one charge were masked at this point and excluded from further analyses. The control and treated runs were then divided into two appropriate groups, and the raw abundances (areas under the peaks) of all the features were normalized. The features (features with charges of  $< +2$  were masked and excluded from further analyses) were used to calculate a normalization factor to correct the experimental variation between the runs. The iPhos program added an extra function, which utilized the parameters  $m/z$  value, RT adjustment, and charge state linked up with qualitative identification and quantitative proteomics analysis in phosphoproteomics research.

## Specimens

Colorectal cancer tissue (79 samples) from patients diagnosed with early stage II colorectal cancer according to the tumor-node-metastasis (TNM) staging system and who had undergone curative surgery for primary colorectal cancer were retrospectively provided by the Tissue Bank of National Cheng Kung University Hospital from 1999 to 2007 (<http://tissuebank.med.ncku.edu.tw/tbs/>). After curative surgery for colorectal cancer lesion(s), patients routinely received postoperative 5-fluorouracil-based adjuvant chemotherapy. Patients in this cohort were tracked for the interval between the diagnosis and the last contact (disease-free survival or cancer relapse or death). The median tracking time was 109 months (ranging from 74.5 to 120 months). All retrospectively collected clinic samples of the colorectal cancer patients were approved by and complied with the regulations of the Ethics Committee of National Cheng Kung University Hospital (Name of the IRB: The Use of Tyrosine Phosphoproteomics Technology for Identifying The Colorectal Cancer Biomarker Correlated with Early Recurrence; Reference Code: ER-100-294). All clinic participants were informed and gave their express agree to participate in this study. All clinic participants had to sign the consent forms before patient participated in this study.

## Immunohistochemistry

The immunohistochemistry (IHC) of tissue specimen of 79 of stage II colorectal cancer was examined in duplicate by sampling tumor tissue cores (4- $\mu\text{m}$ -thick paraffin-embedded sections) from the Tissue Bank of National Cheng Kung University Hospital. The process were performed according to the Bond-Max automated IHC stain protocol (Leica Biosystems Newcastle Ltd.). IHC was performed using anti-CDK1 (phospho Y15) (Epitomics, clone EPR7875, cat. no ab133463, and dilution 1:250). Counterstaining was performed with hematoxylin. The

IHC of each tissue specimen were evaluated under a light microscope (Zeiss Axio Imager A1, Jena, Germany) at 200× magnification.

## Statistical analysis

All data are expressed as the mean  $\pm$  standard deviation (SD). CDK1 pTyr15 level and clinical and pathologic parameters were assessed by the chi-square test, Fisher's exact test or the Mann–Whitney *U*-test to determine the differences in non-parametric groups. ANOVA was used to determine the differences in parametric groups. Kaplan-Meier curves were used to assess the association of immunohistochemical reactivity of anti-CDK1 pTyr15 with disease-free survival. A *p*-value  $< 0.05$  based on two-tailed statistical analysis was considered statistically significant. All the above measures were calculated using SPSS software (Statistical Package for the Social Sciences, version 18.0, Chicago, IL).

## Results and Discussion

### Strategy for Identifying the Tyrosine Phosphoproteome in Colorectal Cell Lines

To identify tyrosine-phosphorylated proteins associated with colorectal cancer progression, we analyzed proteins that were differentially expressed between the highly invasive SW620 colorectal cancer cells and their relatively noninvasive counterpart, SW480 cells (as shown in [S1 Fig](#)). [Fig 1](#) represents the analytic strategy. Prior to LC-MS analysis, to diminish the potential for non-phosphoprotein interference and to increase the phosphotyrosine protein signals, the extracted proteins from the two colorectal cancer cells were separately reacted with the anti-pTyr antibodies 4G10 and PT66, mixed and applied for phosphotyrosine protein purification. After incubation, the eluents from the immunoprecipitated proteins were examined by SDS-PAGE. There was different levels of proteins with at least three protein bands labeled with 1 to 3 in the red rectangle between the SW480 and SW620 cells ([S2 Fig](#)). For further LC-MS analysis, eluted proteins from the immunoprecipitated purification of SW480 and SW620 cell lysates were individually run through an SDS-PAGE stacking gel to concentrate the protein and were then treated with in-gel tryptic digestion. An additional  $\text{TiO}_2$  micro-column after in-gel digestion was employed to remove non-phosphopeptides. From the  $\text{TiO}_2$  micro-column preparation for SW480 and SW620 cell samples, each prepared sample was aliquoted in pairs, with a phosphorylated portion (untreated with alkaline phosphatase) and dephosphorylated portion (treated with alkaline phosphatase). The phosphorylation and dephosphorylation portion pairs were separately analyzed by LC-MS. Two biological replicates of SW480 and SW620 samples (treated with and without alkaline phosphatase, respectively) were performed for LC-MS analysis ([S3 Fig](#)). Each biological replicate included three technical replicates, resulting a total of twenty-four analyses and providing information on reproducibility ( $n = 8 \times 3 = 24$ ) ([S4](#) and [S5 Figs](#)). The detailed LC-MS analysis and results are described in the following section.

### Identification of Tyrosine-Phosphorylated Proteins in SW480 and SW620 Cells

After the LC-MS analysis, the results showed that 20,000 monoisotopic peaks were present in each LC-MS analysis. To produce a high yield of phosphopeptide signals for further targeted LC-MS/MS analysis in the iPhos analysis [[32](#)], the iPhos analytical parameters were set as follows, a maximum number of 1000 for the LC-MS dataset of phosphorylation and dephosphorylation pairs; a mass tolerance of 0.1 Da; a retention time tolerance after dephosphorylation within five min [[17](#), [20](#), [33](#)]; and a charge state of  $\geq 2$ . The signals selected from the comparison

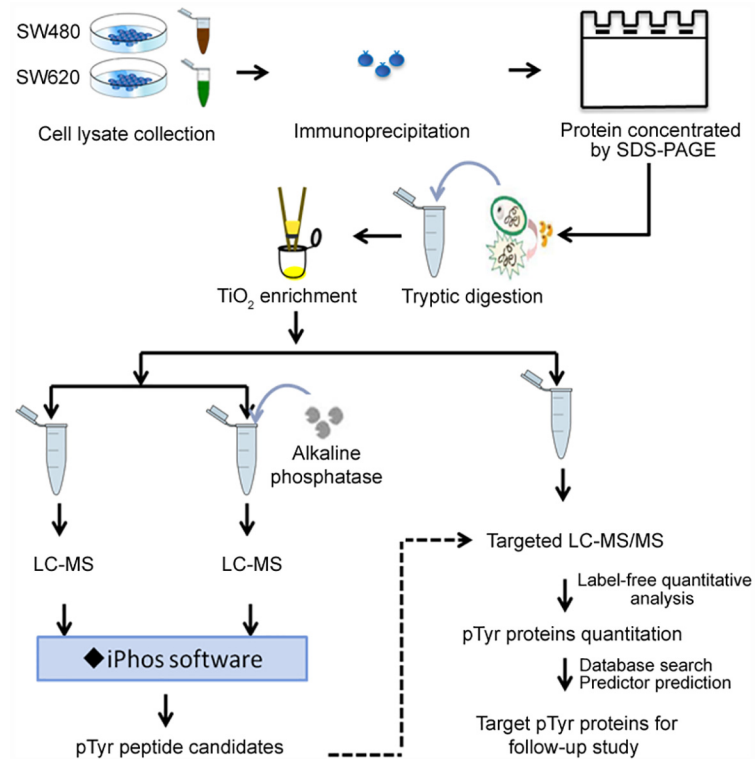

**Fig 1. Experimental flowchart for the analysis of pTyr proteins in colorectal cancer cell lines.**

doi:10.1371/journal.pone.0158844.g001

with the signals for phosphorylation and dephosphorylation by iPhos showed that a total of 365 *m/z* signals were filtered from 6 LC-MS analyses of phosphorylation and dephosphorylation pairs for prepared SW480 and SW620 cells (Fig 2A). Furthermore, 74 signals of *m/z* were found in the integral multiple of 79.966 Da that shifted within the pairs of phosphorylated and dephosphorylated samples and that overlapped between the SW480 and SW620 cells, and 102 and 189 *m/z* signals were found in the integral multiple of 79.966 Da that shifted in the SW480 and SW620 cells, respectively. These 365 *m/z* signals generated by iPhos filtration were subjected to further targeted LC-MS/MS analysis. Based on the LC-MS investigation, we combined the comparative proteomics study with the alkaline phosphatase treatment/lack of treatment of SW480 and SW620 cells and demonstrated a possible increase in the efficiency of phosphopeptide identification after immunoprecipitation enrichment and iPhos signal filtration.

In the LC-MS/MS analysis, the MS/MS peak list was submitted and searched by the Mascot server. In the Mascot analysis, mass deviations for precursor ions and a false discovery rate of  $\leq 2.5\%$  were used. Finally, phosphotyrosine peptides were selected by following the Mascot search results reported for pTyr modification if the peptide score was greater than 25 and the peptide rank was 1 in the data identified from the LC-MS/MS analysis. A total of 280 pTyr peptides (approximately 76.7% (280/365) were identified by the targeted LC MS/MS analyses (S1 Table). After iPhos mass shifting analysis, the possibility of sequencing for low abundance pTyr peptides was increased [35, 36]. Further analysis revealed the distribution of single ( $n = 144$ , 51.4%), double ( $n = 105$ , 37.5%) and multiple ( $n = 31$ , 11.1%) phosphorylated peptides from the identified peptide (Fig 2B). In addition, 135 (47.0%, 135/287) pTyr sites had been reported in the PhosphoSitePlus database (PSP, <http://www.phosphosite.org/>) for protein

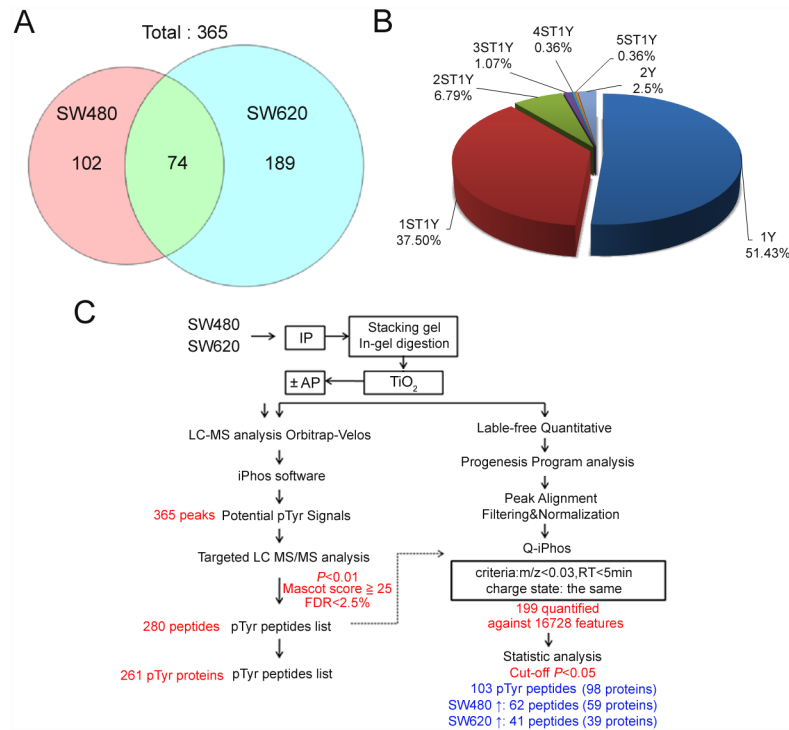

**Fig 2. The identified phosphopeptide signals from LC-MS and LC-MS/MS analyses.** (A) A total of 365 *m/z* signals that were identified as potential phosphopeptides from SW480 and SW620 cells were filtered using the iPhos program. There were 74 peptides that overlapped and presented in both cells. There were 102 and 189 potential phosphopeptides with differential level in the SW480 and SW620 cells, respectively. (B) A summary of single ( $n = 144$ , 51.4%), double ( $n = 105$ , 37.5%) and multiple ( $n = 31$ , 11.1%) phosphorylation sites from the identified phosphorylated peptides identified by the Mascot search. (C) A summary of the overall results through a flowchart of the label-free quantitative analysis.

doi:10.1371/journal.pone.0158844.g002

phosphorylation sites [37]. A total of 103 (35.9%, 103/287) sites were predicted as potential pTyr sites from the phosphorylation site database (PHOSIDA, <http://www.phosida.com/>) [38, 39]. By combining these two results that 186 (64.8%) sites with either tyrosine phosphorylation sites (or predicted as possible substrates of tyrosine kinases).

### Tyrosine-Phosphorylated Proteins with Different Level in SW480 and SW620 Cells

In the relative label-free quantitative analysis of the identified pTyr peptides, the individual 6 replicate datasets from the targeted LC-MS analysis of SW480 and SW620 samples were aligned by using Progenesis QI software. Each feature with fewer than three isotopes and with charges  $< +2$  were masked and excluded from further analyses. A total of 16,728 features were generated from the alignment of these targeted LC-MS/MS analysis datasets based on the drift of the retention time ( $< five$  minutes) and an *m/z* of  $< 0.03$  Da. To examine the significance of the pTyr peptide levels for the prepared SW480 and SW620 samples using ANOVA, a total of 103 pTyr peptides from 98 proteins ( $p < 0.05$ ) were found, and 62 and 41 pTyr peptides had higher level in the SW480 and SW620 cells, respectively (Fig 2C). In addition, to confidently identify the pTyr peptides, the identified sequences were manually filtered with the following two criteria: (1) each identified pTyr peptide was more than three b or y ion signals near to or on the distributed pTyr site [20], and (2) the delta score in the Mascot scores of the peptides



was more than 5 with different phosphorylated sites [40, 41]. By combining the targeted LC-MS/MS and Progenesis QI analyses, the following 10 pTyr proteins were found to have higher level in the SW480 cell line than in the SW620 cell line, poly (ADP-ribose) glycohydrolase (PARG), teratocarcinoma-derived growth factor I (TDGF1), HORMA domain-containing protein I (HORMAD1), phosphatidylinositol N-acetylglucosaminyltransferase subunit C (PIGC), neural cell adhesion molecule II (NCAM2), cyclin-dependent kinase 2 (CDK2), INO80 complex subunit D (INO80D), solute carrier organic anion transporter family member 2A1 (SLCO2A1), solute carrier family 12 member 1 (SLC12A1), and solute carrier family 12 member 1 (aMETTL19) (Table 1). In contrast, the following three pTyr proteins were found to have higher level in the SW620 cells than in the SW480 cells: fibroblast growth factor receptor III (FGFR3), putative RNA helicase Ski2w (SKI2W), and acyl-Coenzyme A dehydrogenase family member 8 isoform CRA\_a (ACAD8) (Table 1).

### Correlation between High level CDK1 pTyr15 and Good Prognosis in Stage II Colorectal Cancer Patients

We selected CDK2 for further investigation based on the peptide score from label-free MS-based proteomics quantification (Table 1). First, the level of CDK2 pTyr15 in SW480 and SW620 cells was examined by western blot. The western blot analysis showed that the CDK2 pTyr15 had 3.6-fold higher level in the SW480 cells relative to the SW620 cells (Fig 3A). Additionally, level of the CDK family protein CDK1 was examined in SW480 and SW620 cells; CDK1 pTyr15 was uniquely up-regulated among other CDK family members in SW480 cells compared with SW620 cells (Fig 3A). Because CDK1 and CDK2 had the same phosphorylation site (<sup>10</sup>IGEGTpYGVVYK<sup>20</sup>) and CDK1 pTyr15 was more highly expressed than CDK2 pTyr15 in SW480 cells, CDK1 was selected for further investigation. To examine the phosphorylation status of pTyr15 on CDK1 in human colorectal cancer tissues, immunoreactive intensities for CDK1 pTyr15 in surgical tumor tissues and adjacent normal tissues were compared. Representative results of the IHC analysis showed increased protein levels of CDK1 pTyr15 in tumor tissues compared with the adjacent normal, control tissues (Fig 3B). Based on the results of the IHC staining area, the tumor cells that could be counted into (1) low CDK1 pTyr15 level were named the  $\leq 50\%$  group of total cancer cells ( $n = 65$ ), and (2) those with high CDK1 pTyr15 level were named the  $> 50\%$  group of total cancer cells ( $n = 14$ ). After analyzing the IHC stained area, 50% staining of the total area of cancer cells was used as the cut-off value to evaluate stage II colorectal cancer patients. The results showed that CDK1 pTyr15 level was significantly associated with disease-free survival ( $p = 0.004$ ) (Table 2). In addition, survival analysis showed that CDK1 pTyr15 level has the potential to be used as a biomarker to predict disease-free survival in stage II patients (Fig 3C). When CDK1 pTyr15 level was less than 50% of the staining area of the total cancer cells, the disease-free survival will decrease by approximately 30% after 60 months ( $p = 0.018$ ). The results indicated that CDK1 pTyr15 level was a significant independent predictor of disease-free survival for colorectal cancer patients.

In this study, the purpose was to find prognostic biomarkers, to provide an accurate risk assessment for stage II colorectal cancer patients and to identify an aggressive therapy to follow surgery. Currently, a number of molecular biomarkers have been recommended, such as mutations in *KRAS* [42] and *CEA* [43]. Nevertheless, none of these candidate biomarkers have been clearly shown to be useful for the diagnosis or staging of patients with stage II colorectal cancer. Of the 10 highly expressed tyrosine phosphoproteins identified in the SW480 cells (Table 1), at least 4 candidates were able to anticipate cancer progression. PARG has been shown to participate in colon cancer cell growth and proliferation [44], TDGF1 is the founding member of the epidermal growth factor family and is overexpressed in the majority of human primary

**Table 1. pTyr peptides with altered levels between SW480 and SW620 cells.**

| Gene name                                      | Protein name                                                    | Peptide Score <sup>a</sup> | Ratio <sup>b</sup> (SW620/SW480) | p-value <sup>c</sup> (ANOVA-test) | Identified peptide sequence <sup>d</sup> | pTyr site |
|------------------------------------------------|-----------------------------------------------------------------|----------------------------|----------------------------------|-----------------------------------|------------------------------------------|-----------|
| <b>pTyr peptides with high levels in SW480</b> |                                                                 |                            |                                  |                                   |                                          |           |
| CDK2                                           | Cyclin-dependent kinase 2                                       | 50                         | 0.40                             | 0.0275                            | IGEGpTpYGVVYK                            | Y15       |
| PARG                                           | Poly(ADP-ribose) glycohydrolase                                 | 49                         | 0.06                             | 8.90E-09                          | pYLDQFVPEK                               | Y832      |
| INO80D                                         | INO80 complex subunit D                                         | 39                         | 0.23                             | 0.0032                            | pYNpSQRCTNPIPK                           | Y57       |
| SLC12A1                                        | Solute carrier family 12 member 1                               | 39                         | 0.53                             | 0.0008                            | MKPNTLVIGpYK                             | Y781      |
| TDGF1                                          | Teratocarcinoma-derived growth factor 1                         | 34                         | 0.29                             | 0.0204                            | FSpYSVIWIMAISK                           | Y11       |
| HORMAD1                                        | HORMA domain-containing protein 1                               | 32                         | 0.16                             | 1.97E-06                          | pYTNNGPLMDFISK                           | Y101      |
| NCAM2                                          | Neural cell adhesion molecule 2                                 | 33                         | 0.10                             | 0.0017                            | VAAVNGKGGQDpYSK                          | Y580      |
| SLCO2A1                                        | Solute carrier organic anion transporter family member 2A1      | 29                         | 0.26                             | 0.0287                            | pYLGQLMGYK                               | Y606      |
| PIGC                                           | Phosphatidylinositol N-acetylglucosaminyl transferase subunit C | 28                         | 0.35                             | 0.0019                            | pYAQPVPtNpTK                             | Y2        |
| METTL19                                        | Probable tRNA (uracil-O(2)-)-methyltransferase                  | 27                         | 0.13                             | 6.42E-06                          | MSNVpYQIQLSHSK                           | Y234      |
| <b>pTyr peptides with high levels in SW620</b> |                                                                 |                            |                                  |                                   |                                          |           |
| FGFR3                                          | Fibroblast growth factor receptor 3                             | 49                         | 1.87                             | 0.0073                            | DGGEpYLCR                                | Y607      |
| ACAD8                                          | Acyl-Coenzyme A dehydrogenase family, member 8, isoform CRA_a   | 32                         | 1.58                             | 0.0152                            | QGDHpYILNGSK                             | Y56       |
| SKI2W                                          | Putative RNA helicase Ski2w                                     | 27                         | 1.59                             | 0.0447                            | RDIGFAASLpYTQ                            | Y1244     |

<sup>a</sup> Peptide score derived from the mascot

<sup>b</sup> Ratio derived from the normalized peak abundance from the SW620 sample divided by that of the SW480 sample,  $Ratio = \overline{x}_{620} / \overline{x}_{480}$

<sup>c</sup> p-value refers to the significance or the difference between SW480 and SW620 cells by using one-way ANOVA

<sup>d</sup> Modified residues were underlined, indicating phosphorylation (STY), oxidation (M), carboxyamidomethylation (C), and deamidation (N,Q).

doi:10.1371/journal.pone.0158844.t001

colorectal carcinomas and breast cancer [45], FGFR3 expression increases cell migration/invasion in colon cancer cells [46], and CDK1 has an essential role in control of the cell cycle and/or proliferation, and the dysregulation of CDK1 activity has been found in different human tumors [47, 48].

The CDK1 protein is a major player in a primary cell cycle checkpoint [49], whereby CDK1 interacts with cyclin B to form an active heterodimer that determines the timing of the G2 to M phase transition [49–51]. The cyclin B/CDK1 heterodimer is inactivated via the phosphorylation of CDK1 at two negative regulatory sites, tyrosine 15 (Tyr15) and threonine 14 (Thr14). Tyr15 is located in the ATP-binding site of CDK1 and inhibits phosphate transfer to a bound substrate, while phosphorylation of CDK1 Thr14 prevents ATP binding to CDK1. The inactivation of CDK1 via Tyr15 phosphorylation functions as a response to inhibit the initiation of mitosis in animal cells [52]. When cells in G2 phase proceed to M phase, CDK1 pTyr15 is dephosphorylated and activated by the protein phosphatase, cell division cycle 25 (CDC25) [53]. Phosphorylation of CDK1 by WEE1 leads to inactivation of CDK1, which prevents entry into the G2 to M transition [54–56]. However, recent reports have indicated WEE1 expression dose not markedly increased in CDK1 phosphorylation in human cancer [57]. Accumulating studies have shown that kinases as a target for cancer therapy use their driving action by over-expression, mutation and protein fusion [58]. Increased levels of WEE1 are observed in many different human cancers types, especially p53-deficient tumor [57, 59–62]. WEE1 is also over-expression in colon cancer [63]. WEE1 as target for anticancer therapy is considered to be potential therapeutic strategy when genomic instability with deficient p53 signaling and

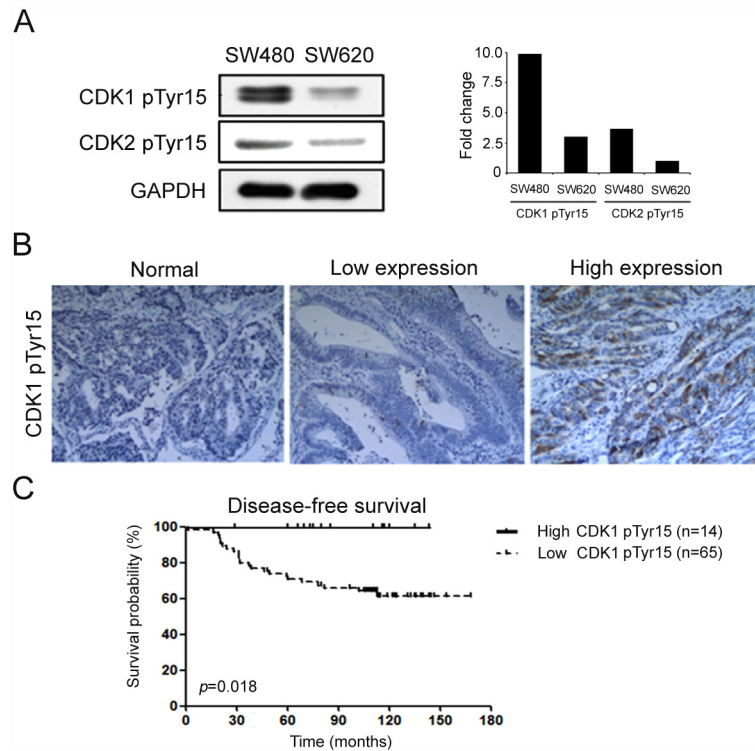

**Fig 3. Differential expression of CDK1 pTyr15 in colorectal cancer cells and tissues.** (A) Left panel, western blots of CDK1 pTyr15 and CDK2 pTyr15 expression in SW480 and SW620 cells. The relative intensity was quantified for CDK1 pTyr15 protein in SW480 and SW620 cells. Glyceraldehyde-3-phosphate dehydrogenase (GAPDH) was used as the loading control. Right panel, quantification of the western blot data is provided as the fold change. (B) Representative images of various CDK1 pTyr15 protein immunoreactivities in different samples of colorectal cancer tissues: left, the adjacent normal specimen staining; middle, the staining of the specimen was less than 50% total cancer cells; and right, the staining specimen was greater than 50% total cancer cells under a light microscope at 200x magnification. (C) Kaplan-Meier curves for disease-free survival for 79 stage II colorectal cancer patients according to CDK1 pTyr15 expression.

doi:10.1371/journal.pone.0158844.g003

depend on WEE1 pathway for survival of mitosis [57]. PD0166285, a nonselective tyrosine kinase inhibitor of WEE1 to effect G2-abrogation when combined with irradiation that was used as an anticancer agent in experiments on various cancer cell lines [64–66]. Limitation of our study contain a relatively small sample size compared with other colon cancer studies. In this study, we propose that CDK1 pTyr15 (inactive form) acts as good prognostic biomarker in context of stage II colorectal cancer (n = 79). Comparing the report that specific activity of CDK1 was a predictor of tumor recurrence in stage II colon cancer from two patient cohorts (n = 254). The specific activity of CDK1 (active form) was significantly associated with worse distant metastasis rate and lower cause-specific survival [48]. The two studies described CDK1 differed in activation and inactivation, as well as associated poor prognosis and good prognosis in stage II colon cancer, respectively. Furthermore, CDK1 nuclear/cytoplasmic ratios in colon cancer tissue specimens predicts metastatic-free survival of affected patients (n = 164) [67]. We found that the low level of CDK1 pTyr15 was an indicator of the recurrence of colorectal cancer (Fig 3C). Although we cannot exclude possible contributions from Thr14 phosphorylation of CDK1 in colorectal cancer progression, this is the first study to evaluate that CDK1 pTyr15 predicted recurrence probabilities in stage II colorectal cancer.

**Table 2. Correlation between CDK1 pTyr15 expression and clinicopathological features in colorectal cancer.**

| Characteristics                     | Number | CDK1 pTyr15 expression |                          | p values           |
|-------------------------------------|--------|------------------------|--------------------------|--------------------|
|                                     |        | High (>50%) (n = 14)   | Low (<or = 50%) (n = 65) |                    |
| <u>Gender</u>                       |        |                        |                          | 0.769 <sup>b</sup> |
| Male                                | 44     | 7                      | 37                       |                    |
| Female                              | 35     | 7                      | 28                       |                    |
| <u>Tumor status<sup>a</sup></u>     |        |                        |                          | 0.285 <sup>b</sup> |
| T3                                  | 64     | 13                     | 51                       |                    |
| T4                                  | 15     | 1                      | 14                       |                    |
| <u>Histological Differentiation</u> |        |                        |                          | 0.390 <sup>c</sup> |
| Well                                | 14     | 4                      | 10                       |                    |
| Moderate                            | 62     | 10                     | 52                       |                    |
| Poor                                | 3      | 0                      | 3                        |                    |
| <u>Original primary tumor</u>       |        |                        |                          | 0.769 <sup>b</sup> |
| Colon—Sigmoid                       | 44     | 7                      | 27                       |                    |
| Rectum                              | 35     | 7                      | 38                       |                    |
| <u>Mucinous histology</u>           |        |                        |                          | 0.213 <sup>b</sup> |
| Yes                                 | 5      | 2                      | 3                        |                    |
| No                                  | 74     | 12                     | 62                       |                    |
| <u>Disease-Free</u>                 |        |                        |                          | 0.004 <sup>b</sup> |
| Yes                                 | 55     | 14                     | 41                       |                    |
| No                                  | 24     | 0                      | 24                       |                    |

<sup>a</sup> According the American Joint Committee on Colon and Rectum Cancer stage Manual, Seventh Edition (AJCC VII), the stages of T3 and T4 in Colon and rectum cancer were indicated tumor cells invades through the muscularis propria into pericorectal tissues, and no regional lymph node metastasis; these T3 and T4 stages will be sorted into the overall stage IIA, IIB, or IIC for Colon and rectum cancer.

<sup>b</sup> Analyzed with the Fisher's exact test

<sup>c</sup> Analyzed with the Pearson Chi-Square ( $\chi^2$ ) test.

doi:10.1371/journal.pone.0158844.t002

## Conclusion

In summary, the signal intensity of pTyr peptides is considered to be relatively small during MS analysis due to a lower abundance, which impedes pTyr peptide identification. In this approach, based on the strategy of an initial specific immunoaffinity enrichment for the pTyr peptides and in-gel digestion, the subsequent TiO<sub>2</sub> micro-column enrichment and combination with a home-developed iPhos program provided additional phosphopeptide enrichment and phosphopeptide signal identification, resulting in the identification of 280 pTyr peptides from the colorectal cancer cell lines SW480 and SW620 by LC-MS analysis. This phosphotyrosine proteome may provide a basic resource for studying the roles of protein tyrosine phosphorylation in colorectal cancer. From the label-free quantitative analysis, a total of 103 pTyr peptides from 98 proteins were identified, and 62 and 41 pTyr peptides were found to have higher differential expression in the SW480 and SW620 cells, respectively. High level of the candidate protein CDK1 pTyr15 in SW480 cells was validated by western blot. The results of the evaluation of clinical samples suggested that CDK1 pTyr15 is a potential indicator of the disease-free survival probability for stage II colorectal cancer patients. Other candidates, PARG and TDGF1, have been associated with cancer regulation; however, the functional role of the candidates HORMAD1, PIGC, NCAM2, INO80D, SLCO2A1, SLC12A1, and METTL19 was unclear in colorectal cancer. Further studies of their participation in the colorectal cancer process may be of great value.

## Supporting Information

**S1 Fig. Cell morphologies and biochemical characterization of SW480 and SW620 cell lines.**

(TIF)

**S2 Fig. Protein profiles of SW480 and SW620 cells.**

(TIF)

**S3 Fig. Samples preparation for LC-MS analysis.**

(TIF)

**S4 Fig. Reproducibility of LC-MS measurements for SW480 cell lines.**

(TIF)

**S5 Fig. Reproducibility of LC-MS measurements for SW620 cell lines.**

(TIF)

**S1 Table. Identified pTyr peptides in the SW480 and SW620 cell lines.**

(DOCX)

## Acknowledgments

The authors thank the Tissue Bank of National Cheng Kung University Hospital for providing tissue samples. This study was supported by grants from the National Cheng Kung University, Taiwan (NCKUH-10105014), the [Ministry of Science and Technology](#), Taiwan (MOST103-2811-M-006-021, 103-2113-M-006-003-MY3, 100-2113-M-006-002-MY3, 102-2352-B-006-003), the National Science Council, Taiwan (NSC 99-2923-M-006-001), Kaohsiung Medical University, Aim for the Top 500 Universities grant and Aim for the Top Universities Grant, No. KMU-TP104E12.

## Author Contributions

Conceived and designed the experiments: P.C. Lin YFY P.C. Liao. Performed the experiments: ESLH P.C. Lin YFY. Analyzed the data: P.C. Lin YFY YMAC P.C. Liao. Contributed reagents/materials/analysis tools: P.C. Lin YCT PCC CTL JCL. Wrote the paper: P.C. Lin YCT YFY P.C. Liao.

## References

1. Ferlay J, Shin HR, Bray F, Forman D, Mathers C, Parkin DM. Estimates of worldwide burden of cancer in 2008: GLOBOCAN 2008. *Int J Cancer*. 2010; 127(12):2893–917. doi: [10.1002/ijc.25516](#) PMID: [21351269](#).
2. McLeod HL, Murray GI. Tumour markers of prognosis in colorectal cancer. *Br J Cancer*. 1999; 79(2):191–203. doi: [10.1038/sj.bjc.6690033](#) PMID: [9888457](#); PubMed Central PMCID: PMC2362193.
3. Aggarwal C, Meropol NJ, Punt CJ, Iannotti N, Saidman BH, Sabbath KD, et al. Relationship among circulating tumor cells, CEA and overall survival in patients with metastatic colorectal cancer. *Ann Oncol*. 2013; 24(2):420–8. doi: [10.1093/annonc/mds336](#) PMID: [23028040](#).
4. Duffy MJ. Carcinoembryonic antigen as a marker for colorectal cancer: is it clinically useful? *Clin Chem*. 2001; 47(4):624–30. PMID: [11274010](#).
5. Cohen AM, Tremitterra S, Candela F, Thaler HT, Sigurdson ER. Prognosis of node-positive colon cancer. *Cancer*. 1991; 67(7):1859–61. PMID: [2004298](#).
6. Sugimoto K, Sakamoto K, Tomiki Y, Goto M, Kojima Y, Komiyama H. The validity of predicting prognosis by the lymph node ratio in node-positive colon cancer. *Dig Surg*. 2013; 30(4–6):368–74. doi: [10.1159/000355444](#) PMID: [24107470](#).

7. Suzuki O, Sekishita Y, Shiono T, Ono K, Fujimori M, Kondo S. Number of lymph node metastases is better predictor of prognosis than level of lymph node metastasis in patients with node-positive colon cancer. *J Am Coll Surg*. 2006; 202(5):732–6. doi: [10.1016/j.jamcollsurg.2006.02.007](https://doi.org/10.1016/j.jamcollsurg.2006.02.007) PMID: [16648012](https://pubmed.ncbi.nlm.nih.gov/16648012/).
8. Morandell S, Stasyk T, Grosstessner-Hain K, Roitinger E, Mechtler K, Bonn GK, et al. Phosphoproteomics strategies for the functional analysis of signal transduction. *Proteomics*. 2006; 6(14):4047–56. doi: [10.1002/pmic.200600058](https://doi.org/10.1002/pmic.200600058) PMID: [16791829](https://pubmed.ncbi.nlm.nih.gov/16791829/).
9. Gibbs JB, Oliff A. Pharmaceutical research in molecular oncology. *Cell*. 1994; 79(2):193–8. PMID: [7954788](https://pubmed.ncbi.nlm.nih.gov/7954788/).
10. Mann M, Ong SE, Gronborg M, Steen H, Jensen ON, Pandey A. Analysis of protein phosphorylation using mass spectrometry: deciphering the phosphoproteome. *Trends Biotechnol*. 2002; 20(6):261–8. PMID: [12007495](https://pubmed.ncbi.nlm.nih.gov/12007495/).
11. Nita-Lazar A, Saito-Benz H, White FM. Quantitative phosphoproteomics by mass spectrometry: past, present, and future. *Proteomics*. 2008; 8(21):4433–43. doi: [10.1002/pmic.200800231](https://doi.org/10.1002/pmic.200800231) PMID: [18846511](https://pubmed.ncbi.nlm.nih.gov/18846511/); PubMed Central PMCID: PMC2701620.
12. Talamonti MS, Roh MS, Curley SA, Gallick GE. Increase in activity and level of pp60c-src in progressive stages of human colorectal cancer. *J Clin Invest*. 1993; 91(1):53–60. doi: [10.1172/JCI116200](https://doi.org/10.1172/JCI116200) PMID: [7678609](https://pubmed.ncbi.nlm.nih.gov/7678609/); PubMed Central PMCID: PMC329994.
13. McKinley ET, Liu H, McDonald WH, Luo W, Zhao P, Coffey RJ, et al. Global phosphotyrosine proteomics identifies PKCdelta as a marker of responsiveness to Src inhibition in colorectal cancer. *PLoS One*. 2013; 8(11):e80207. doi: [10.1371/journal.pone.0080207](https://doi.org/10.1371/journal.pone.0080207) PMID: [24260357](https://pubmed.ncbi.nlm.nih.gov/24260357/); PubMed Central PMCID: PMC3832668.
14. Rikova K, Guo A, Zeng Q, Possemato A, Yu J, Haack H, et al. Global survey of phosphotyrosine signaling identifies oncogenic kinases in lung cancer. *Cell*. 2007; 131(6):1190–203. doi: [10.1016/j.cell.2007.11.025](https://doi.org/10.1016/j.cell.2007.11.025) PMID: [18083107](https://pubmed.ncbi.nlm.nih.gov/18083107/).
15. Wolf-Yadlin A, Kumar N, Zhang Y, Hautaniemi S, Zaman M, Kim HD, et al. Effects of HER2 overexpression on cell signaling networks governing proliferation and migration. *Mol Syst Biol*. 2006; 2:54. doi: [10.1038/msb4100094](https://doi.org/10.1038/msb4100094) PMID: [17016520](https://pubmed.ncbi.nlm.nih.gov/17016520/); PubMed Central PMCID: PMC1682017.
16. Kettenbach AN, Gerber SA. Rapid and reproducible single-stage phosphopeptide enrichment of complex peptide mixtures: application to general and phosphotyrosine-specific phosphoproteomics experiments. *Analytical chemistry*. 2011; 83(20):7635–44. doi: [10.1021/ac201894j](https://doi.org/10.1021/ac201894j) PMID: [21899308](https://pubmed.ncbi.nlm.nih.gov/21899308/); PubMed Central PMCID: PMC3251014.
17. Wu HY, Tseng VS, Chen LC, Chang YC, Ping P, Liao CC, et al. Combining alkaline phosphatase treatment and hybrid linear ion trap/Orbitrap high mass accuracy liquid chromatography-mass spectrometry data for the efficient and confident identification of protein phosphorylation. *Analytical chemistry*. 2009; 81(18):7778–87. doi: [10.1021/ac9013435](https://doi.org/10.1021/ac9013435) PMID: [19702290](https://pubmed.ncbi.nlm.nih.gov/19702290/).
18. Ding VM, Boersema PJ, Foong LY, Preisinger C, Koh G, Natarajan S, et al. Tyrosine phosphorylation profiling in FGF-2 stimulated human embryonic stem cells. *PLoS One*. 2011; 6(3):e17538. doi: [10.1371/journal.pone.0017538](https://doi.org/10.1371/journal.pone.0017538) PMID: [21437283](https://pubmed.ncbi.nlm.nih.gov/21437283/); PubMed Central PMCID: PMC3060089.
19. Wu HY, Tseng VS, Liao PC. Mining phosphopeptide signals in liquid chromatography-mass spectrometry data for protein phosphorylation analysis. *J Proteome Res*. 2007; 6(5):1812–21. doi: [10.1021/pr060631d](https://doi.org/10.1021/pr060631d) PMID: [17402769](https://pubmed.ncbi.nlm.nih.gov/17402769/).
20. Wu HY, Tseng VS, Chen LC, Chang HY, Chuang IC, Tsay YG, et al. Identification of tyrosine-phosphorylated proteins associated with lung cancer metastasis using label-free quantitative analyses. *J Proteome Res*. 2010; 9(8):4102–12. doi: [10.1021/pr1006153](https://doi.org/10.1021/pr1006153) PMID: [20572634](https://pubmed.ncbi.nlm.nih.gov/20572634/).
21. Montoya A, Beltran L, Casado P, Rodriguez-Prados JC, Cutillas PR. Characterization of a TiO(2) enrichment method for label-free quantitative phosphoproteomics. *Methods*. 2011; 54(4):370–8. doi: [10.1016/j.jymeth.2011.02.004](https://doi.org/10.1016/j.jymeth.2011.02.004) PMID: [21316455](https://pubmed.ncbi.nlm.nih.gov/21316455/); PubMed Central PMCID: PMC3158853.
22. Gilmore JM, Kettenbach AN, Gerber SA. Increasing phosphoproteomic coverage through sequential digestion by complementary proteases. *Analytical and bioanalytical chemistry*. 2012; 402(2):711–20. doi: [10.1007/s00216-011-5466-5](https://doi.org/10.1007/s00216-011-5466-5) PMID: [22002561](https://pubmed.ncbi.nlm.nih.gov/22002561/); PubMed Central PMCID: PMC3592360.
23. Nuhse TS, Bottrill AR, Jones AM, Peck SC. Quantitative phosphoproteomic analysis of plasma membrane proteins reveals regulatory mechanisms of plant innate immune responses. *Plant J*. 2007; 51(5):931–40. doi: [10.1111/j.1365-3113.2007.03192.x](https://doi.org/10.1111/j.1365-3113.2007.03192.x) PMID: [17651370](https://pubmed.ncbi.nlm.nih.gov/17651370/); PubMed Central PMCID: PMC2156193.
24. Nuhse TS, Stensballe A, Jensen ON, Peck SC. Large-scale analysis of in vivo phosphorylated membrane proteins by immobilized metal ion affinity chromatography and mass spectrometry. *Molecular & cellular proteomics: MCP*. 2003; 2(11):1234–43. doi: [10.1074/mcp.T300006-MCP200](https://doi.org/10.1074/mcp.T300006-MCP200) PMID: [14506206](https://pubmed.ncbi.nlm.nih.gov/14506206/).
25. Blacken GR, Volny M, Vaisar T, Sadilek M, Turecek F. In situ enrichment of phosphopeptides on MALDI plates functionalized by reactive landing of zirconium(IV)-n-propoxide ions. *Analytical*

- chemistry. 2007; 79(14):5449–56. doi: [10.1021/ac070790w](https://doi.org/10.1021/ac070790w) PMID: [17569507](https://pubmed.ncbi.nlm.nih.gov/17569507/); PubMed Central PMCID: [PMC2576294](https://pubmed.ncbi.nlm.nih.gov/PMC2576294/).
26. Olsen JV, Blagoev B, Gnäd F, Macek B, Kumar C, Mortensen P, et al. Global, in vivo, and site-specific phosphorylation dynamics in signaling networks. *Cell*. 2006; 127(3):635–48. doi: [10.1016/j.cell.2006.09.026](https://doi.org/10.1016/j.cell.2006.09.026) PMID: [17081983](https://pubmed.ncbi.nlm.nih.gov/17081983/).
  27. Boersema PJ, Foong LY, Ding VM, Lemeer S, van Breukelen B, Philp R, et al. In-depth qualitative and quantitative profiling of tyrosine phosphorylation using a combination of phosphopeptide immunoaffinity purification and stable isotope dimethyl labeling. *Molecular & cellular proteomics: MCP*. 2010; 9(1):84–99. doi: [10.1074/mcp.M900291-MCP200](https://doi.org/10.1074/mcp.M900291-MCP200) PMID: [19770167](https://pubmed.ncbi.nlm.nih.gov/19770167/); PubMed Central PMCID: [PMC2808269](https://pubmed.ncbi.nlm.nih.gov/PMC2808269/).
  28. Leibovitz A, Stinson JC, McCombs WB 3rd, McCoy CE, Mazur KC, Mabry ND. Classification of human colorectal adenocarcinoma cell lines. *Cancer Res*. 1976; 36(12):4562–9. PMID: [1000501](https://pubmed.ncbi.nlm.nih.gov/1000501/).
  29. Chiu KH, Chang YH, Wu YS, Lee SH, Liao PC. Quantitative secretome analysis reveals that COL6A1 is a metastasis-associated protein using stacking gel-aided purification combined with iTRAQ labeling. *J Proteome Res*. 2011; 10(3):1110–25. doi: [10.1021/pr1008724](https://doi.org/10.1021/pr1008724) PMID: [21186846](https://pubmed.ncbi.nlm.nih.gov/21186846/).
  30. Bellew M, Coram M, Fitzgibbon M, Igra M, Randolph T, Wang P, et al. A suite of algorithms for the comprehensive analysis of complex protein mixtures using high-resolution LC-MS. *Bioinformatics*. 2006; 22(15):1902–9. doi: [10.1093/bioinformatics/btl276](https://doi.org/10.1093/bioinformatics/btl276) WOS:000239899700013. PMID: [16766559](https://pubmed.ncbi.nlm.nih.gov/16766559/)
  31. Yang T-H, Chang H-T, Hsiao E, Sun J-L, Wang C-C, Wu H-Y, et al. iPhos: a toolkit to streamline the alkaline phosphatase-assisted comprehensive LC-MS phosphoproteome investigation. *BMC Bioinformatics*. 2014; 15(Suppl 16):S10. doi: [10.1186/1471-2105-15-S16-S10](https://doi.org/10.1186/1471-2105-15-S16-S10) PMID: [25521246](https://pubmed.ncbi.nlm.nih.gov/25521246/)
  32. Yang TH, Chang HT, Hsiao ES, Sun JL, Wang CC, Wu HY, et al. iPhos: a toolkit to streamline the alkaline phosphatase-assisted comprehensive LC-MS phosphoproteome investigation. *BMC Bioinformatics*. 2014; 15 Suppl 16:S10. doi: [10.1186/1471-2105-15-S16-S10](https://doi.org/10.1186/1471-2105-15-S16-S10) PMID: [25521246](https://pubmed.ncbi.nlm.nih.gov/25521246/); PubMed Central PMCID: [PMC4290636](https://pubmed.ncbi.nlm.nih.gov/PMC4290636/).
  33. Wang MC, Lee YH, Liao PC. Optimization of titanium dioxide and immunoaffinity-based enrichment procedures for tyrosine phosphopeptide using matrix-assisted laser desorption/ionization time-of-flight mass spectrometry. *Analytical and bioanalytical chemistry*. 2015; 407(5):1343–56. doi: [10.1007/s00216-014-8352-0](https://doi.org/10.1007/s00216-014-8352-0) PMID: [25486920](https://pubmed.ncbi.nlm.nih.gov/25486920/).
  34. Marcantonio M, Trost M, Courcelles M, Desjardins M, Thibault P. Combined enzymatic and data mining approaches for comprehensive phosphoproteome analyses: application to cell signaling events of interferon-gamma-stimulated macrophages. *Molecular & cellular proteomics: MCP*. 2008; 7(4):645–60. doi: [10.1074/mcp.M700383-MCP200](https://doi.org/10.1074/mcp.M700383-MCP200) PMID: [18006492](https://pubmed.ncbi.nlm.nih.gov/18006492/).
  35. Imanishi SY, Kochin V, Ferraris SE, de Thonel A, Pallari HM, Corthals GL, et al. Reference-facilitated phosphoproteomics—Fast and reliable phosphopeptide validation by microLC-ESI-Q-TOF MS/MS. *Molecular & Cellular Proteomics*. 2007; 6(8):1380–91. doi: [10.1074/mcp.M600480-MCP200](https://doi.org/10.1074/mcp.M600480-MCP200) WOS:000248810100008.
  36. Marcantonio M, Trost M, Courcelles M, Desjardins M, Thibault P. Combined enzymatic and data mining approaches for comprehensive phosphoproteome analyses. *Molecular & Cellular Proteomics*. 2008; 7(4):645–60. doi: [10.1074/mcp.M700383-MCP200](https://doi.org/10.1074/mcp.M700383-MCP200) WOS:000254879200003.
  37. Hornbeck PV, Chabra I, Kornhauser JM, Skrzypek E, Zhang B. PhosphoSite: A bioinformatics resource dedicated to physiological protein phosphorylation. *Proteomics*. 2004; 4(6):1551–61. doi: [10.1002/pmic.200300772](https://doi.org/10.1002/pmic.200300772) PMID: [15174125](https://pubmed.ncbi.nlm.nih.gov/15174125/).
  38. Gnäd F, Ren S, Cox J, Olsen JV, Macek B, Oroschi M, et al. PHOSIDA (phosphorylation site database): management, structural and evolutionary investigation, and prediction of phosphosites. *Genome Biol*. 2007; 8(11):R250. doi: [10.1186/gb-2007-8-11-r250](https://doi.org/10.1186/gb-2007-8-11-r250) PMID: [18039369](https://pubmed.ncbi.nlm.nih.gov/18039369/); PubMed Central PMCID: [PMC2258193](https://pubmed.ncbi.nlm.nih.gov/PMC2258193/).
  39. Gnäd F, Gunawardena J, Mann M. PHOSIDA 2011: the posttranslational modification database. *Nucleic Acids Res*. 2011; 39(Database issue):D253–60. doi: [10.1093/nar/gkq1159](https://doi.org/10.1093/nar/gkq1159) PMID: [21081558](https://pubmed.ncbi.nlm.nih.gov/21081558/); PubMed Central PMCID: [PMC3013726](https://pubmed.ncbi.nlm.nih.gov/PMC3013726/).
  40. Sugiyama N, Masuda T, Shinoda K, Nakamura A, Tomita M, Ishihama Y. Phosphopeptide enrichment by aliphatic hydroxy acid-modified metal oxide chromatography for nano-LC-MS/MS in proteomics applications. *Molecular & cellular proteomics: MCP*. 2007; 6(6):1103–9. doi: [10.1074/mcp.T600060-MCP200](https://doi.org/10.1074/mcp.T600060-MCP200) PMID: [17322306](https://pubmed.ncbi.nlm.nih.gov/17322306/).
  41. Savitski MM, Lemeer S, Boesche M, Lang M, Mathieson T, Bantscheff M, et al. Confident phosphorylation site localization using the Mascot Delta Score. *Molecular & cellular proteomics: MCP*. 2011; 10(2): M110 003830. doi: [10.1074/mcp.M110.003830](https://doi.org/10.1074/mcp.M110.003830) PMID: [21057138](https://pubmed.ncbi.nlm.nih.gov/21057138/); PubMed Central PMCID: [PMC3033680](https://pubmed.ncbi.nlm.nih.gov/PMC3033680/).
  42. Phipps AI, Buchanan DD, Makar KW, Win AK, Baron JA, Lindor NM, et al. KRAS-mutation status in relation to colorectal cancer survival: the joint impact of correlated tumour markers. *Br J Cancer*. 2013; 108(8):1757–64. doi: [10.1038/bjc.2013.118](https://doi.org/10.1038/bjc.2013.118) PMID: [23511557](https://pubmed.ncbi.nlm.nih.gov/23511557/); PubMed Central PMCID: [PMC3668469](https://pubmed.ncbi.nlm.nih.gov/PMC3668469/).

43. Moertel CG, O'Fallon JR, Go VL, O'Connell MJ, Thynne GS. The preoperative carcinoembryonic antigen test in the diagnosis, staging, and prognosis of colorectal cancer. *Cancer*. 1986; 58(3):603–10. PMID: [3731019](#).
44. Fauzee NJ, Li Q, Wang YL, Pan J. Silencing Poly (ADP-Ribose) glycohydrolase (PARG) expression inhibits growth of human colon cancer cells in vitro via PI3K/Akt/NFkappa-B pathway. *Pathol Oncol Res*. 2012; 18(2):191–9. doi: [10.1007/s12253-011-9428-1](#) PMID: [21713600](#).
45. Bianco C, Strizzi L, Mancino M, Rehman A, Hamada S, Watanabe K, et al. Identification of cripto-1 as a novel serologic marker for breast and colon cancer. *Clin Cancer Res*. 2006; 12(17):5158–64. doi: [10.1158/1078-0432.CCR-06-0274](#) PMID: [16951234](#).
46. Henriksson ML, Edin S, Dahlin AM, Oldenborg PA, Oberg A, Van Guelpen B, et al. Colorectal cancer cells activate adjacent fibroblasts resulting in FGF1/FGFR3 signaling and increased invasion. *Am J Pathol*. 2011; 178(3):1387–94. doi: [10.1016/j.ajpath.2010.12.008](#) PMID: [21356388](#); PubMed Central PMCID: PMC3070577.
47. Barascu A, Besson P, Le Floch O, Bournoux P, Jourdan ML. CDK1-cyclin B1 mediates the inhibition of proliferation induced by omega-3 fatty acids in MDA-MB-231 breast cancer cells. *Int J Biochem Cell Biol*. 2006; 38(2):196–208. doi: [10.1016/j.biocel.2005.08.015](#) PMID: [16194618](#).
48. Zeestraten EC, Maak M, Shibayama M, Schuster T, Nitsche U, Matsushima T, et al. Specific activity of cyclin-dependent kinase I is a new potential predictor of tumour recurrence in stage II colon cancer. *Br J Cancer*. 2012; 106(1):133–40. doi: [10.1038/bjc.2011.504](#) PMID: [22108518](#); PubMed Central PMCID: PMC3251853.
49. Castedo M, Perfettini JL, Roumier T, Kroemer G. Cyclin-dependent kinase-1: linking apoptosis to cell cycle and mitotic catastrophe. *Cell Death Differ*. 2002; 9(12):1287–93. doi: [10.1038/sj.cdd.4401130](#) PMID: [12478465](#).
50. Potapova TA, Daum JR, Byrd KS, Gorbisky GJ. Fine tuning the cell cycle: activation of the Cdk1 inhibitory phosphorylation pathway during mitotic exit. *Mol Biol Cell*. 2009; 20(6):1737–48. doi: [10.1091/mbc.E08-07-0771](#) PMID: [19158392](#); PubMed Central PMCID: PMC2655249.
51. Welburn JP, Tucker JA, Johnson T, Lindert L, Morgan M, Willis A, et al. How tyrosine 15 phosphorylation inhibits the activity of cyclin-dependent kinase 2-cyclin A. *J Biol Chem*. 2007; 282(5):3173–81. doi: [10.1074/jbc.M609151200](#) PMID: [17095507](#).
52. Smits VA, Medema RH. Checking out the G(2)/M transition. *Biochim Biophys Acta*. 2001; 1519(1–2):1–12. PMID: [11406266](#).
53. Boutros R, Lobjois V, Ducommun B. CDC25 phosphatases in cancer cells: key players? Good targets? *Nat Rev Cancer*. 2007; 7(7):495–507. doi: [10.1038/nrc2169](#) PMID: [17568790](#).
54. Parker LL, Piwnica-Worms H. Inactivation of the p34cdc2-cyclin B complex by the human WEE1 tyrosine kinase. *Science*. 1992; 257(5078):1955–7. PMID: [1384126](#).
55. Heald R, McLoughlin M, McKeon F. Human wee1 maintains mitotic timing by protecting the nucleus from cytoplasmically activated Cdc2 kinase. *Cell*. 1993; 74(3):463–74. PMID: [8348613](#).
56. Squire CJ, Dickson JM, Ivanovic I, Baker EN. Structure and inhibition of the human cell cycle checkpoint kinase, Wee1A kinase: an atypical tyrosine kinase with a key role in CDK1 regulation. *Structure*. 2005; 13(4):541–50. doi: [10.1016/j.str.2004.12.017](#) PMID: [15837193](#).
57. De Witt Hamer PC, Mir SE, Noske D, Van Noorden CJ, Wurdinger T. WEE1 kinase targeting combined with DNA-damaging cancer therapy catalyzes mitotic catastrophe. *Clin Cancer Res*. 2011; 17(13):4200–7. doi: [10.1158/1078-0432.CCR-10-2537](#) PMID: [21562035](#).
58. Krause DS, Van Etten RA. Tyrosine kinases as targets for cancer therapy. *The New England journal of medicine*. 2005; 353(2):172–87. doi: [10.1056/NEJMra044389](#) PMID: [16014887](#).
59. McGowan CH, Russell P. Cell cycle regulation of human WEE1. *EMBO J*. 1995; 14(10):2166–75. PMID: [7774574](#); PubMed Central PMCID: PMC398322.
60. Watanabe N, Broome M, Hunter T. Regulation of the human WEE1Hu CDK tyrosine 15-kinase during the cell cycle. *EMBO J*. 1995; 14(9):1878–91. PMID: [7743995](#); PubMed Central PMCID: PMC398287.
61. O'Connell MJ, Raleigh JM, Verkade HM, Nurse P. Chk1 is a wee1 kinase in the G2 DNA damage checkpoint inhibiting cdc2 by Y15 phosphorylation. *EMBO J*. 1997; 16(3):545–54. doi: [10.1093/emboj/16.3.545](#) PMID: [9034337](#); PubMed Central PMCID: PMC1169658.
62. Katayama K, Fujita N, Tsuruo T. Akt/protein kinase B-dependent phosphorylation and inactivation of WEE1Hu promote cell cycle progression at G2/M transition. *Mol Cell Biol*. 2005; 25(13):5725–37. doi: [10.1128/MCB.25.13.5725-5737.2005](#) PMID: [15964826](#); PubMed Central PMCID: PMC1156994.
63. Mir SE, De Witt Hamer PC, Krawczyk PM, Balaj L, Claes A, Niers JM, et al. In silico analysis of kinase expression identifies WEE1 as a gatekeeper against mitotic catastrophe in glioblastoma. *Cancer cell*. 2010; 18(3):244–57. doi: [10.1016/j.ccr.2010.08.011](#) PMID: [20832752](#); PubMed Central PMCID: PMC3115571.



64. Hashimoto O, Ueno T, Kimura R, Ohtsubo M, Nakamura T, Koga H, et al. Inhibition of proteasome-dependent degradation of Wee1 in G2-arrested Hep3B cells by TGF beta 1. *Mol Carcinog.* 2003; 36(4):171–82. doi: [10.1002/mc.10111](https://doi.org/10.1002/mc.10111) PMID: [12669309](https://pubmed.ncbi.nlm.nih.gov/12669309/).
65. Li J, Wang Y, Sun Y, Lawrence TS. Wild-type TP53 inhibits G(2)-phase checkpoint abrogation and radiosensitization induced by PD0166285, a WEE1 kinase inhibitor. *Radiat Res.* 2002; 157(3):322–30. PMID: [11839095](https://pubmed.ncbi.nlm.nih.gov/11839095/).
66. Wang Y, Li J, Booher RN, Kraker A, Lawrence T, Leopold WR, et al. Radiosensitization of p53 mutant cells by PD0166285, a novel G(2) checkpoint abrogator. *Cancer Res.* 2001; 61(22):8211–7. PMID: [11719452](https://pubmed.ncbi.nlm.nih.gov/11719452/).
67. Sung WW, Lin YM, Wu PR, Yen HH, Lai HW, Su TC, et al. High nuclear/cytoplasmic ratio of Cdk1 expression predicts poor prognosis in colorectal cancer patients. *BMC Cancer.* 2014; 14:951. doi: [10.1186/1471-2407-14-951](https://doi.org/10.1186/1471-2407-14-951) PMID: [25511643](https://pubmed.ncbi.nlm.nih.gov/25511643/); PubMed Central PMCID: PMC4302138.
